# Supplementary material for: Phytochemical Composition, Antioxidant and Antiproliferative Activities of Citrus hystrix, Citrus limon, Citrus pyriformis, and Citrus microcarpa Leaf Essential Oils against Human Cervical Cancer Cell Line
Source: MDPI journal article supplement (doi:10.3390/plants12010134), 2022-12-27
Supplement: s1 [file s1]

# Phytochemical Composition, Antioxidant and Antiproliferative Activities of *Citrus hystrix*, *Citrus limon*, *Citrus pyriformis*, and *Citrus microcarpa* Leaf Essential Oils against Human Cervical Cancer Cell Line

Haneen Ibrahim Al Othman <sup>1</sup>, Huda Hisham Alkatib <sup>2</sup>, Atiqah Zaid <sup>1</sup>, Sreenivasan Sasidharan <sup>2</sup>, Siti Sarah Fazalul Rahiman <sup>3</sup>, Tien Ping Lee <sup>4,\*</sup>, George Dimitrovski <sup>5</sup>, Jalal T. Althakafy <sup>6</sup> and Yong Foo Wong <sup>1,\*</sup>

<sup>1</sup> Centre for Research on Multidimensional Separation Science, School of Chemical Sciences, Universiti Sains Malaysia, Penang 11800, Malaysia

<sup>2</sup> Institute for Research in Molecular Medicine (INFORMM), Universiti Sains Malaysia, Penang 11800, Malaysia

<sup>3</sup> School of Pharmaceutical Sciences, Universiti Sains Malaysia, Penang 11800, Malaysia

<sup>4</sup> RCSI & UCD Malaysia Campus, 4 Jalan Sepoy Lines, Penang 10450, Malaysia

<sup>5</sup> Ajoya Capital Limited, World Trade Centre 1, Jl. Jenderal Sudirman Kav. 29-31, Jakarta 12920, Indonesia

<sup>6</sup> Department of Chemistry, Faculty of Applied Science, Umm Al-Qura University, Makkah 21955, Saudi Arabia

\* Correspondence: leetienping@rcsiucd.edu.my (T.P.L.); wongyongfoo@usm.my (Y.F.W.);  
Tel.: +60-4653-4031 (Y.F.W.)

## Supplementary material

**Table S1.** Secondary compounds identified in different *Citrus* spp. leaf oils using GC–MS.

| No | Compounds       | CASRN      | Molecular formula               | <sup>a</sup> Class | <sup>b</sup> Match Factor (Reverse Match Factor)    | RI <sub>ref</sub> | <sup>c</sup> m/z of significant ions (relative ion abundance)                                                                                                               | <sup>d</sup> R <sub>ical</sub>                  |                         |                         |                        |
|----|-----------------|------------|---------------------------------|--------------------|-----------------------------------------------------|-------------------|-----------------------------------------------------------------------------------------------------------------------------------------------------------------------------|-------------------------------------------------|-------------------------|-------------------------|------------------------|
|    |                 |            |                                 |                    |                                                     |                   |                                                                                                                                                                             | <sup>e</sup> (Relative percentage abundance, %) |                         |                         |                        |
|    |                 |            |                                 |                    |                                                     |                   |                                                                                                                                                                             | CL                                              | CH                      | CM                      | CP                     |
| 1  | Thujene, α-     | 5-2-2867   | C <sub>10</sub> H <sub>16</sub> | MH                 | 918 (918);<br>917 (918);<br>932 (947);<br>920 (920) | 925               | 93.1 (100), 91.1 (74.56), 77.1 (42.36);<br>93.1 (100), 91.1 (65.57), 77.1 (40.07);<br>93.1 (100), 91.1 (65.97), 77.1 (42.24);<br>93.1 (100), 91.1 (65.93), 77.1 (39.69)     | 925<br>(0.03±<br>0.01)                          | 925<br>(0.03±<br>0.01)  | 925<br>(0.13±<br>0.01)  | 925<br>(0.04±<br>0.01) |
| 2  | Pinene, α-      | 80-56-8    | C <sub>10</sub> H <sub>16</sub> | MH                 | 948 (949);<br>940 (943);<br>952 (954);<br>945 (948) | 935               | 93.1 (100), 91.1 (48.75), 92.1 (39.17);<br>93.1 (100), 91.1 (48.10), 92.1 (36.00);<br>93.1 (100), 91.1 (49.53), 92.1 (38.79);<br>93.1 (100), 91.1 (47.73), 92.1 (38.09)     | 930<br>(0.67±<br>0.01)                          | 930<br>(0.14±<br>0.01)  | 931<br>(1.41±<br>0.03)  | 930<br>(0.60±<br>0.01) |
| 3  | Camphene        | 79-92-5    | C <sub>10</sub> H <sub>16</sub> | MH                 | 901 (901);<br>854 (854);<br>944 (957);<br>877 (877) | 944               | 93.1 (100), 121.2 (74.53), 91.0 (53.75);<br>93.1 (100), 121.2 (57.71), 76.9 (62.38);<br>93.1 (100), 121.1 (73.25), 91.1 (37.15);<br>93.1 (100), 121.0 (86.33), 77.1 (44.80) | 944<br>(0.02±<br>0.01)                          | 944<br>(0.01±<br>0.01)  | 944<br>(0.100±<br>0.01) | 944<br>(0.01±<br>0.01) |
| 4  | Sabinene        | 3387-41-5  | C <sub>10</sub> H <sub>16</sub> | MH                 | 941 (948);<br>949 (955);<br>949 (957)               | 971               | 93.1 (100), 91.1 (50.15), 77.1 (38.85);<br>93.1 (100), 91.1 (51.67), 77.1 (39.52);<br>93.1 (100), 91.1 (49.63), 77.1 (38.47)                                                | 971<br>(0.69±<br>0.03)                          | 972<br>3.02±<br>0.06)   | NA                      | 971<br>0.89±<br>0.01)  |
| 5  | Pinene, β-      | 18172-67-3 | C <sub>10</sub> H <sub>16</sub> | MH                 | 948 (948);<br>936 (936);<br>941 (941);<br>940 (943) | 973               | 93.1 (100), 91.1 (33.03), 79.1 (26.68);<br>93.1 (100), 91.1 (33.43), 79.1 (26.28);<br>93.1 (100), 91.1 (33.39), 79.1 (26.96);<br>93.1 (100), 91.1 (34.28), 79.1 (25.15)     | 973<br>(1.83±<br>0.02)                          | 973<br>(0.16±<br>0.05)  | 978<br>(7.12±<br>0.23)  | 973<br>(0.12±<br>0.02) |
| 6  | Myrcene, β-     | 123-35-3   | C <sub>10</sub> H <sub>16</sub> | MH                 | 939 (953);<br>949 (964);<br>940 (956);<br>949 (962) | 991               | 93.1 (100), 69.1 (61.56), 91.1 (27.58);<br>93.1 (100), 69.1 (60.67), 91.1 (27.67);<br>93.1 (100), 69.1 (60.51), 91.1 (27.26);<br>93.1 (100), 69.1 (60.26), 91.1 (27.74)     | 992<br>(1.78±<br>0.02)                          | 991<br>(0.80±<br>0.01)  | 991<br>(0.28±<br>0.01)  | 992<br>(1.63±<br>0.01) |
| 7  | Phellandren, α- | 99-83-2    | C <sub>10</sub> H <sub>16</sub> | MH                 | 926 (927);<br>908 (908);<br>923 (925);              | 1002              | 93.1 (100), 91.1 (64.51), 77.1 (39.28);<br>93.1 (100), 91.1 (77.61), 77.1 (38.79);<br>93.1 (100), 91.1 (64.64), 77.1 (37.23)                                                | 1003<br>(0.48±<br>0.01)                         | 1002<br>(0.02±<br>0.01) | 1002<br>(0.14±<br>0.01) | NA                     |

|    |                      |            |                                   |           |                                                     |      |                                                                                                                                                                                 |                          |                          |                         |                          |
|----|----------------------|------------|-----------------------------------|-----------|-----------------------------------------------------|------|---------------------------------------------------------------------------------------------------------------------------------------------------------------------------------|--------------------------|--------------------------|-------------------------|--------------------------|
| 8  | 3-Carene             | 13466-78-9 | C <sub>10</sub> H <sub>16</sub>   | <i>MH</i> | 934 (934);<br>926 (933);<br>904 (921);<br>897 (906) | 1008 | 93.1 (100), 91.1 (56.18), 77.1 (35.85);<br>93.1 (100), 91.1 (55.54), 77.1 (44.27);<br>93.1 (100), 91.1 (51.84), 77.1 (33.96);<br>93.1 (100), 91.1 (47.73), 77.1 (35.68)         | 1010<br>(5.42±<br>0.08)  | 1008<br>(0.05±<br>0.01)  | 1008<br>(0.38±<br>0.01) | 1008<br>(0.03±<br>0.01)  |
| 9  | Terpinene,<br>α-     | 99-86-5    | C <sub>10</sub> H <sub>16</sub>   | <i>MH</i> | 932 (940);<br>940 (945);<br>977 (935);<br>858 (585) | 1015 | 121.1 (100), 93.1 (71.74), 136.1 (46.36);<br>121.1 (100), 93.1 (72.90), 136.1 (54.12);<br>121.1 (100), 93.1 (77.03), 136.1 (50.85);<br>121.1 (100), 93.1 (71.27), 136.1 (46.63) | 1012<br>(0.15±<br>0.04)  | 1015<br>(0.05±<br>0.01)  | 1015<br>(0.20±<br>0.01) | 1023<br>(0.02±<br>0.01)  |
| 10 | Limonene             | 138-86-3   | C <sub>10</sub> H <sub>16</sub>   | <i>MH</i> | 952 (953);<br>905 (905);<br>935 (936);<br>955 (956) | 1033 | 93.1 (100), 68.2 (98.59), 67.2 (82.02);<br>93.1 (100), 68.2 (62.14), 67.1 (53.19);<br>93.1 (100), 68.1 (73.71), 67.2 (63.04);<br>68.2 (100), 93.2 (99.09), 67.2 (80.60)         | 1033<br>(33.57±<br>0.54) | 1026<br>(0.21±<br>0.02)  | 1027<br>(1.70±<br>0.03) | 1038<br>(70.40±<br>0.46) |
| 11 | Eucalyptol           | 470-82-6   | C <sub>10</sub> H <sub>18</sub> O | <i>MO</i> | 875 (875);<br>940 (941)                             | 1029 | 81.1 (100), 108.1 (85.20), 111.1 (82.94);<br>81.1 (100), 108.1 (97.85), 111.1 (86.57)                                                                                           | NA                       | 1029<br>(0.08±<br>0.01)  | 1029<br>(0.23±<br>0.01) | NA                       |
| 12 | Ocimene,<br>trans-β- | 3779-61-1  | C <sub>10</sub> H <sub>16</sub>   | <i>MH</i> | 947 (947);<br>917 (917);<br>949 (950);<br>936 (939) | 1038 | 93.1 (100), 91.1 (53.07), 79.1 (40.33);<br>93.1 (100), 91.1 (51.45), 79.1 (43.22);<br>93.1 (100), 91.1 (50.91), 92.1 (39.45);<br>93.1 (100), 91.1 (53.60), 92.1 (39.22)         | 1039<br>(0.34±<br>0.01)  | 1038<br>(0.044±<br>0.01) | 1038<br>(0.11±<br>0.01) | 1038<br>(0.16±<br>0.02)  |
| 13 | Ocimene, β-          | 13877-91-3 | C <sub>10</sub> H <sub>16</sub>   | <i>MH</i> | 951 (952);<br>934 (934);<br>949 (949);<br>945 (945) | 1050 | 93.1 (100), 91.1 (56.62), 79.1 (46.19);<br>93.1 (100), 91.1 (53.24), 79.1 (44.57);<br>93.1 (100), 91.1 (53.72), 79.1 (44.23);<br>93.1 (100), 91.1 (55.17), 79.1 (44.64)         | 1050<br>(1.96±<br>0.02)  | 1048<br>(0.48±<br>0.01)  | 1050<br>(2.36±<br>0.03) | 1051<br>(1.91±<br>0.01)  |
| 14 | Terpinene,<br>γ-     | 99-85-4    | C <sub>10</sub> H <sub>16</sub>   | <i>MH</i> | 955 (956);<br>950 (950);<br>947 (953);<br>955 (956) | 1057 | 93.1 (100), 91.1 (65.90), 136.1 (45.44);<br>93.1 (100), 91.1 (64.25), 136.1 (47.04);<br>93.1 (100), 91.1 (57.87), 136.1 (44.36);<br>93.1 (100), 91.1 (64.92), 136.1 (45.81)     | 1058<br>(0.15±<br>0.03)  | 1057<br>(0.08±<br>0.01)  | 1057<br>(0.29±<br>0.01) | 1058<br>(0.25±<br>0.01)  |
| 15 | 4-Thujanol           | 15537-55-0 | C <sub>10</sub> H <sub>18</sub> O | <i>OM</i> | 842 (842);<br>923 (923);<br>852 (852);<br>823 (827) | 1060 | 93.1 (100), 71.1 (95.60), 111.1 (79.24);<br>93.1 (100), 71.1 (93.20), 111.1 (80.16);<br>71.1 (100), 93.1 (81.98), 111.1 (76.47);<br>93.1(100), 71.1 (69.43), 111.1 (68.32)      | 1065<br>(0.01±<br>0.01)  | 1065<br>(0.05±<br>0.01)  | 1065<br>(0.01±<br>0.01) | 1066<br>(0.01±<br>0.01)  |

|    |                         |                |                                                |    |                                                     |      |                                                                                                                                                                                 |                         |                          |                         |                         |
|----|-------------------------|----------------|------------------------------------------------|----|-----------------------------------------------------|------|---------------------------------------------------------------------------------------------------------------------------------------------------------------------------------|-------------------------|--------------------------|-------------------------|-------------------------|
| 16 | 1-Octanol               | 111-87-5       | C <sub>8</sub> H <sub>18</sub> O               | OA | 926 (926);<br>862 (878);<br>921 (933)               | 1072 | 56.1 (100), 55.1 (95.02), 70.0 (82.33);<br>56.2 (100), 55.1 (69.86), 69.1 (65.09);<br>56.2 (100), 55.1 (90.41), 69.2 (80.08)                                                    | 1072<br>(0.01±<br>0.01) | NA                       | 1072<br>(0.01±<br>0.01) | 1072<br>(0.01±<br>0.01) |
| 17 | Trans-linalool<br>oxide | 34995-<br>77-2 | C <sub>10</sub> H <sub>18</sub> O <sub>2</sub> | MO | 946 (949)                                           | 1071 | 59.1 (100), 94.2 (66.84), 93.1 (54.80)                                                                                                                                          | NA                      | 1071<br>(0.07±<br>0.01)  | NA                      | NA                      |
| 18 | Terpinolene             | 586-62-9       | C <sub>10</sub> H <sub>16</sub>                | MH | 926 (942);<br>919 (922);<br>939 (944);<br>922 (925) | 1087 | 121.1 (100), 93.1 (99.35), 136.2 (87.49);<br>121.1 (100), 136.1 (93.82), 93.1 (89.14);<br>121.1 (100), 93.1 (99.73), 136.1 (91.90);<br>121.1 (100), 93.1 (95.15), 136.2 (82.49) | 1087<br>(1.54±<br>0.02) | 1086<br>(0.13±<br>0.01)  | 1086<br>(0.13±<br>0.01) | 1087<br>(0.08±<br>0.01) |
| 19 | Linalool                | 78-70-6        | C <sub>10</sub> H <sub>18</sub> O              | OM | 932 (932);<br>912 (913);<br>946 (946);<br>946 (946) | 1101 | 71.1 (100), 93.1 (97.92), 55.2 (55.40);<br>71.1 (100), 93.1 (98.28), 55.1 (54.53);<br>71.1 (100), 93.1 (98.79), 55.1 (53.45);<br>71.1 (100), 93.1 (97.83), 55.1 (55.05)         | 1100<br>(0.73±<br>0.01) | 1101<br>(3.20±<br>0.01)  | 1103<br>(2.90±<br>0.04) | 1101<br>(1.24±<br>0.01) |
| 20 | Nonanal                 | 124-19-6       | C <sub>9</sub> H <sub>18</sub> O               | AA | 907 (907);<br>845 (866);<br>933 (934)               | 1103 | 57.1 (100), 56.1 (66.42), 55.2 (59.58);<br>57.1 (100), 56.1 (81.51), 55.2 (74.65);<br>57.1 (100), 56.2 (60.98), 55.1 (59.00)                                                    | 1104<br>(0.08±<br>0.02) | NA                       | 1105<br>(0.01±<br>0.01) | 1105<br>(0.10±<br>0.01) |
| 21 | Cosmene                 | 460-01-5       | C <sub>10</sub> H <sub>14</sub>                | MH | 932 (938)                                           | 1129 | 91.1 (100), 119.1 (95.35), 134.1 (55.39)                                                                                                                                        | NA                      | NA                       | 1129<br>(0.13±<br>0.01) | NA                      |
| 22 | Isopulegol              | 89-79-2        | C <sub>10</sub> H <sub>18</sub> O              | OM | 955 (940);<br>919 (919)                             | 1145 | 121.1 (100), 67.1 (91.45), 81.1 (89.36);<br>121.1 (100), 67.1 (76.94), 93.2 (75.39)                                                                                             | NA                      | 1145<br>(0.43±<br>0.03)  | NA                      | 1143<br>(0.03±<br>0.01) |
| 23 | Citronellal             | 106-23-0       | C <sub>10</sub> H <sub>18</sub> O              | MA | 925 (925);<br>920 (931);<br>909 (909);<br>923 (923) | 1157 | 69.2 (100), 95.1 (83.95), 55.1 (47.81);<br>69.2 (100), 95.1 (85.86), 121.2 (48.93);<br>69.2 (100), 95.1 (84.22), 121.1 (47.39);<br>69.2 (100), 95.1 (87.03), 121.1 (48.31)      | 1155<br>(1.54±<br>0.01) | 1169<br>(77.69±<br>0.37) | 1154<br>(0.28±<br>0.01) | 1157<br>(5.64±<br>0.02) |
| 24 | Isoneral                | 1754-00-<br>3  | C <sub>10</sub> H <sub>16</sub> O              | MA | 935 (935);<br>920 (920);<br>924 (925)               | 1165 | 109.1 (100), 81.1 (94.44), 67.2 (93.65);<br>57.1 (100), 81.1 (95.44), 55.1 (94.30);<br>109.1 (100), 81.1 (99.68), 67.1 (96.25)                                                  | 1166<br>(0.78±<br>0.02) | 1183<br>(0.02±<br>0.01)  | NA                      | 1165<br>(0.16±<br>0.01) |

|    |                 |            |                                   |    |                                                      |      |                                                                                                                                                                             |                         |                         |                         |                         |
|----|-----------------|------------|-----------------------------------|----|------------------------------------------------------|------|-----------------------------------------------------------------------------------------------------------------------------------------------------------------------------|-------------------------|-------------------------|-------------------------|-------------------------|
| 25 | Terpinen-4-ol   | 562-74-3   | C <sub>10</sub> H <sub>18</sub> O | OM | 916 (918);<br>907 (923);<br>907 (910);<br>905 (905)  | 1176 | 71.1 (100), 93.1 (83.14), 111.1 (74.28);<br>71.1 (100), 93.1 (80.96), 111.1 (79.27);<br>71.1 (100), 93.1 (76.04), 111.1 (75.78);<br>71.1 (100), 93.1 (82.52), 111.1 (71.78) | 1176<br>(0.16±<br>0.04) | 1180<br>(0.12±<br>0.58) | 1175<br>(0.20±<br>0.01) | 1176<br>(0.03±<br>0.01) |
| 26 | Isogeranial     | 55722-59-3 | C <sub>10</sub> H <sub>16</sub> O | MA | 937 (959);<br>931 (932)                              | 1184 | 81.1 (100), 67.1 (84.07), 109.1 (76.29);<br>81.1 (100), 67.1 (84.18), 109.1 (74.65)                                                                                         | 1184<br>(1.20±<br>0.01) | NA                      | NA                      | 1184<br>(0.22±<br>0.01) |
| 27 | Terpineol, α-   | 98-55-5    | C <sub>10</sub> H <sub>18</sub> O | OM | 926 (926);<br>921 (921);<br>919 (919);<br>915 (915)  | 1187 | 121.1 (100), 59.1 (96.93), 93.1 (89.36);<br>59.1 (100), 93.1 (92.44), 121.1 (91.42);<br>59.2 (100), 93.1 (94.28), 121.1 (90.74);<br>121.1 (100), 93.1 (99.04), 59.1 (98.48) | 1190<br>(0.27±<br>0.01) | 1192<br>(0.03±<br>0.01) | 1189<br>(0.14±<br>0.01) | 1189<br>(0.15±<br>0.01) |
| 28 | Decanal         | 112-31-2   | C <sub>10</sub> H <sub>20</sub> O | MA | 872 (878);<br>923 (924);<br>944 (944)                | 1206 | 57.1 (100), 55.1 (99.41), 82.1 (71.82);<br>57.1 (100), 55.1 (88.69), 82.1 (67.95);<br>57.1 (100), 55.1 (88.89), 82.1 (68.90)                                                | 1026<br>(0.07±<br>0.01) | NA                      | 1206<br>(0.07±<br>0.01) | 1206<br>(0.25±<br>0.01) |
| 29 | Citronellol, β- | 106-22-9   | C <sub>10</sub> H <sub>20</sub> O | OM | 937 (937);<br>936 (937);<br>905 (905);<br>948, (950) | 1236 | 69.1 (100), 67.1 (47.78), 81.1 (36.60);<br>69.1 (100), 67.1 (71.79), 81.1 (66.00);<br>69.1 (100), 67.1 (56.05), 81.2 (59.75);<br>69.1 (100), 67.1 (70.83), 81.1 (65.03)     | 1236<br>(5.89±<br>0.04) | 1233<br>(3.75±<br>0.06) | 1229<br>(0.02±<br>0.01) | 1231<br>(0.64±<br>0.01) |
| 30 | Citral, β-      | 106-26-3   | C <sub>10</sub> H <sub>16</sub> O | MA | 949 (950);<br>942 (943)                              | 1242 | 69.2 (100), 109.1 (48.27), 94.1 (38.81);<br>69.2 (100), 109.1 (45.21), 94.1 (37.45)                                                                                         | 1247<br>(9.11±<br>0.04) | NA                      | NA                      | 1243<br>(1.60±<br>0.01) |
| 31 | Geraniol        | 106-24-1   | C <sub>10</sub> H <sub>18</sub> O | OM | 953 (953);<br>878 (878);<br>914 (914)                | 1254 | 69.2 (100), 68.2 (20.36), 93.1 (19.18);<br>69.2 (100), 93.1 (22.50), 68.2 (20.05);<br>69.2 (100), 93.1 (19.72), 68.2 (18.11)                                                | 1261<br>(4.20±<br>0.76) | 1256<br>(0.14±<br>0.04) | NA                      | 1256<br>(0.10±<br>0.01) |
| 32 | 2-Decenal       | 3913-81-3  | C <sub>10</sub> H <sub>18</sub> O | MA | 800 (848)                                            |      | 55.1 (100), 70.1 (88.70), 83.1 (57.71)                                                                                                                                      | NA                      | NA                      | 1261<br>(0.01±<br>0.01) | NA                      |
| 33 | 1-Decanol       | 112-30-1   | C <sub>10</sub> H <sub>22</sub> O | OM | 860 (860)                                            | 1272 | 56.2 (100), 55.0 (96.75), 70.1 (67.21)                                                                                                                                      | NA                      | NA                      | 1273<br>(0.01±<br>0.01) | NA                      |
| 34 | Citral, α-      | 141-27-5   | C <sub>10</sub> H <sub>16</sub> O | MA | 949 (949);<br>942 (942)                              | 1287 | 69.2 (100), 84.1 (27.65), 94.1 (19.55);<br>69.2 (100), 84.1 (28.80), 94.1 (20.16)                                                                                           | 1280<br>(12.02±         | NA                      | NA                      | 1275<br>(2.03±          |

|    |                         |                |                                                |     |                                                     |      |                                                                                                                                                                                     |                         |                         |                         |                                  |
|----|-------------------------|----------------|------------------------------------------------|-----|-----------------------------------------------------|------|-------------------------------------------------------------------------------------------------------------------------------------------------------------------------------------|-------------------------|-------------------------|-------------------------|----------------------------------|
| 35 | Thymol                  | 89-83-8        | C <sub>10</sub> H <sub>14</sub> O              | OM  | 914 (914)                                           | 1293 | 135.1 (100), 150.2 (29.18), 91.1 (17.81)                                                                                                                                            | 0.07)<br>NA             | NA                      | NA                      | 0.02)<br>1293<br>(0.12±<br>0.01) |
| 36 | Undecanal               | 112-44-7       | C <sub>11</sub> H <sub>22</sub> O              | AA  | 925 (925);<br>940 (948)                             | 1307 | 57.1 (100), 55.1 (97.03), 82.2 (81.80);<br>57.1 (100), 55.1 (92.89), 82.2 (92.87)                                                                                                   | 1307<br>(0.09±<br>0.01) | NA                      | NA                      | 1307<br>0.08±<br>0.01)           |
| 37 | p-<br>Vinylguaia<br>col | 7786-61-<br>0  | C <sub>9</sub> H <sub>10</sub> O <sub>2</sub>  | OA  | 896 (906);<br>904 (904);<br>924 (925);<br>931 (933) | 1312 | 150.1 (100), 135.1 (87.76), 107.1 (48.11);<br>150.1 (100), 135.1 (80.85), 107.1 (41.10);<br>150.1 (100), 135.1 (82.42), 107.1 (38.07);<br>150.1 (100), 135.1 (89.89), 107.1 (41.80) | 1313<br>(0.08±<br>0.02) | 1312<br>(0.02±<br>0.01) | 1312<br>(0.06±<br>0.01) | 1312<br>(0.26±<br>0.01)          |
| 38 | Elemene, δ-             | 20307-<br>84-0 | C <sub>15</sub> H <sub>24</sub>                | SH  | 942 (950);<br>943 (951);<br>913 (917)               | 1338 | 121.1 (100), 93.1 (53.09), 107.1 (41.12);<br>121.1 (100), 93.1 (65.01), 136.2 (58.35);<br>121.2 (100), 93.1 (67.04), 136.2 (58.88)                                                  | NA                      | 1336<br>(0.03±<br>0.01) | 1338<br>(3.22±<br>0.01) | 1337<br>(0.11±<br>0.01)          |
| 39 | Citronellol<br>acetate  | 150-84-5       | C <sub>12</sub> H <sub>22</sub> O <sub>2</sub> | MAc | 954 (954);<br>950 (950);<br>872 (881);<br>908 (908) | 1355 | 81.1 (100), 95.1 (97.44), 69.1 (90.52);<br>95.1 (100), 81.1 (98.43), 69.1 (83.91);<br>81.1 (100), 95.1 (92.44), 69.1 (87.26);<br>81.1 (100), 95.1 (96.81), 69.1 (94.12)             | 1355<br>(0.14±<br>0.03) | 1357<br>(2.81±<br>0.06) | 1355<br>(0.02±<br>0.01) | 1355<br>(0.19±<br>0.01)          |
| 40 | Nerol<br>acetate        | 141-12-8       | C <sub>12</sub> H <sub>20</sub> O <sub>2</sub> | MAc | 934 (935);<br>906 (908);<br>907 (907);<br>932 (932) | 1367 | 69.2 (100), 93.1 (55.87), 68.2 (38.06);<br>69.2 (100), 93.2 (53.09), 68.1 (34.91);<br>69.2 (100), 93.2 (59.57), 68.1 (38.53);<br>69.1 (100), 93.1 (61.17), 68.1 (41.17)             | 1369<br>(3.57±<br>0.10) | 1366<br>(0.25±<br>0.03) | 1366<br>(0.03±<br>0.01) | 1367<br>(0.73±<br>0.01)          |
| 41 | Geranyl<br>acetate      | 16409-<br>44-2 | C <sub>12</sub> H <sub>20</sub> O <sub>2</sub> | MAc | 951 (958);<br>916 (926);<br>914 (914);              | 1386 | 69.2 (100), 68.2 (36.97), 93.1 (34.17);<br>69.1 (100), 68.2 (38.07), 93.1 (35.94);<br>69.2 (100), 68.2 (36.12), 93.1 (35.08)                                                        | 1376<br>(2.92±<br>0.04) | 1386<br>(0.96±<br>0.02) | NA                      | 1384<br>(0.39±<br>0.03)          |
| 42 | Elemene, β-             | 515-13-9       | C <sub>15</sub> H <sub>24</sub>                | SH  | 918 (918);<br>919 (921);<br>929 (931)               | 1393 | 93.1 (100), 81.1 (86.08), 67.1 (83.02);<br>93.1 (100), 81.1 (82.01), 107.1 (72.88);<br>93.1 (100), 81.1 (82.01), 107.1 (74.12)                                                      | NA                      | 1391<br>(0.05±<br>0.01) | 1392<br>(1.32±<br>0.01) | 1392<br>(2.78±<br>0.08)          |
| 43 | Dodecanal               | 112-54-9       | C <sub>12</sub> H <sub>24</sub> O              | AH  | 884 (884);<br>885 (887);<br>922 (922)               | 1409 | 57.1 (100), 82.1 (78.51), 55.1 (72.68);<br>57.1 (100), 82.1 (89.26), 55.1 (70.25);<br>57.1 (100), 82.1 (98.40), 55.1 (86.26)                                                        | 1410<br>(0.02±<br>0.01) | NA                      | 1409<br>(0.02±<br>0.01) | 1409<br>(0.10±<br>0.01)          |

|    |                    |            |                                                |     |                                                     |      |                                                                                                                                                                                 |                         |                         |                          |                         |
|----|--------------------|------------|------------------------------------------------|-----|-----------------------------------------------------|------|---------------------------------------------------------------------------------------------------------------------------------------------------------------------------------|-------------------------|-------------------------|--------------------------|-------------------------|
| 44 | Caryophyllene      | 87-44-5    | C <sub>15</sub> H <sub>24</sub>                | SH  | 923 (923);<br>952 (952);<br>937 (937);<br>950 (950) | 1418 | 91.1 (100), 133.1 (94.72), 93.1 (83.53);<br>133.1 (100), 91.1 (92.12), 93.1 (87.47);<br>133.1 (100), 91.1 (95.02), 93.1 (82.61);<br>133.1 (100), 91.1 (91.34), 93.1 (85.56)     | 1418<br>(1.48±<br>0.02) | 1418<br>(0.45±<br>0.01) | 1419<br>(3.29±<br>0.01)  | 1418<br>(1.64±<br>0.03) |
| 45 | Copaene, β-        | 18252-44-3 | C <sub>15</sub> H <sub>24</sub>                | SH  | 945 (945)                                           | 1428 | 161.2 (100), 105.1 (34.42), 91.1 (30.29)                                                                                                                                        | NA                      | NA                      | 1428<br>(0.21±<br>0.01)  | NA                      |
| 46 | Elemene, γ-        | 29873-99-2 | C <sub>15</sub> H <sub>24</sub>                | SH  | 922 (925)                                           | 1433 | 121.1 (100), 93.1 (60.39), 107.1 (43.11)                                                                                                                                        | NA                      | NA                      | 1433<br>(0.55±<br>0.01)  | NA                      |
| 47 | Bergamoten, α-     | 17699-05-7 | C <sub>15</sub> H <sub>24</sub>                | SH  | 925 (944);<br>924 (947)                             | 1430 | 119.1 (100), 93.1 (99.09), 91.1 (50.45);<br>119.1 (100), 93.1 (97.50), 91.1 (49.72)                                                                                             | 1435<br>(0.11±<br>0.01) | NA                      | NA                       | 1435<br>(0.16±<br>0.01) |
| 48 | Humulene           | 6753-98-6  | C <sub>15</sub> H <sub>24</sub>                | SH  | 914 (927);<br>921 (924);<br>914 (927);<br>942 (948) | 1452 | 93.1 (100), 121.1 (36.02), 80.1 (29.55);<br>93.1 (100), 121.1 (36.77), 80.1 (27.13);<br>93.1 (100), 121.1 (35.41), 80.1 (29.10);<br>93.1 (100), 121.1 (35.99), 80.1 (29.46)     | 1452<br>(0.14±<br>0.04) | 1452<br>(0.08±<br>0.01) | 1452<br>(0.64±<br>0.05)  | 1452<br>(0.44±<br>0.01) |
| 49 | Geranyl propionate | 105-90-8   | C <sub>13</sub> H <sub>22</sub> O <sub>2</sub> | MAc | 887 (892)                                           | 1478 | 69.1 (100), 93.1 (75.96), 57.1 (52.10)                                                                                                                                          | 1476<br>(0.13±<br>0.02) | NA                      | NA                       | NA                      |
| 50 | Germacrene D       | 23986-74-5 | C <sub>15</sub> H <sub>24</sub>                | SH  | 888 (902);<br>946 (959);<br>922 (936)               | 1480 | 161.2 (100), 105.1 (50.92), 91.1 (47.97);<br>161.2 (100), 105.1 (49.83), 91.1 (47.17);<br>161.2 (100), 105.1 (49.62), 91.1 (47.63)                                              | NA                      | 1479<br>(0.04±<br>0.01) | 1486<br>(13.04±<br>0.25) | 1479<br>(0.36±<br>0.01) |
| 51 | Bicyclogermacrene  | 24703-35-3 | C <sub>15</sub> H <sub>24</sub>                | SH  | 920 (921);<br>920 (920);<br>923 (924);<br>918 (918) | 1495 | 121.2 (100), 93.1 (65.23), 107.1 (48.60);<br>121.2 (100), 93.1 (67.06), 107.1 (51.53);<br>121.1 (100), 93.1 (67.78), 107.1 (51.70);<br>121.1 (100), 93.1 (86.30), 107.1 (52.65) | 1495<br>(0.13±<br>0.01) | 1495<br>(0.33±<br>0.17) | 1497<br>(2.03±<br>0.38)  | 1495<br>(0.14±<br>0.01) |
| 52 | Selinene, β-       | 17066-67-0 | C <sub>15</sub> H <sub>24</sub>                | SH  | 948 (958);<br>931 (935)                             | 1489 | 105.1 (100), 93.2 (93.51), 107.1 (89.08);<br>93.2 (100), 105.1 (97.15), 107.1 (84.76)                                                                                           | NA                      | NA                      | 1489<br>(2.42±<br>0.17)  | 1484<br>(0.10±<br>0.01) |
| 53 | Muurolene, α-      | 31983-22-9 | C <sub>15</sub> H <sub>24</sub>                | SH  | 878 (882)                                           | 1499 | 105.1 (100), 161.2 (77.77), 91.1 (52.76)                                                                                                                                        | NA                      | 1499<br>(0.02±          | NA                       | NA                      |

|    |                              |             |                                   |    |                                                     |      |                                                                                                                                                                                     |                         |                          |                          |                         |
|----|------------------------------|-------------|-----------------------------------|----|-----------------------------------------------------|------|-------------------------------------------------------------------------------------------------------------------------------------------------------------------------------------|-------------------------|--------------------------|--------------------------|-------------------------|
|    |                              |             |                                   |    |                                                     |      |                                                                                                                                                                                     |                         | 0.01)                    |                          |                         |
| 54 | Farnesene, $\alpha$ -        | 502-61-4    | C <sub>15</sub> H <sub>24</sub>   | SH | 891 (898);<br>919 (922)                             | 1508 | 93.1 (100), 107.2 (53.15), 91.1 (49.68);<br>93.1 (100), 107.1 (48.44), 91.1 (47.56)                                                                                                 | NA                      | 1509<br>(0.07±<br>0.01)  | NA                       | 1508<br>(0.66±<br>0.02) |
| 55 | Bisabolene, $\beta$ -        | 495-61-4    | C <sub>15</sub> H <sub>24</sub>   | SH | 903 (907)                                           | 1509 | 93.1 (100), 69.2 (76.32), 91.1 (44.11)                                                                                                                                              | 1509<br>(0.24±<br>0.07) | NA                       | NA                       | NA                      |
| 56 | Cubebol                      | 23445-02-5  | C <sub>15</sub> H <sub>26</sub> O | OS | 923 (927)                                           | 1514 | 161.1 (100), 207.2 (83.35), 105.1 (44.34)                                                                                                                                           | NA                      | 1514<br>(0.16±<br>0.006) | NA                       | NA                      |
| 57 | Cadinene, $\delta$ -         | 483-76-1    | C <sub>15</sub> H <sub>24</sub>   | SH | 862 (867);<br>912 (919);<br>912 (924);<br>902 (907) | 1523 | 161.1 (100), 119.1 (81.47), 204.2 (67.84);<br>161.1 (100), 119.1 (63.70), 204.2 (53.74);<br>161.1 (100), 119.1 (63.87), 204.2 (57.56);<br>161.2 (100), 119.1 (65.44), 204.2 (60.50) | 1523<br>(0.03±<br>0.01) | 1523<br>(0.17±<br>0.01)  | 1523<br>(0.42±<br>0.01)  | 1523<br>(0.05±<br>0.01) |
| 58 | trans-Sesquisabinene hydrate | 145512-84   | C <sub>15</sub> H <sub>26</sub> O | OS | 810(810)                                            | 1590 | 93.1 (100), 121 (71.77), 119 (61.72)                                                                                                                                                | NA                      | NA                       | NA                       | 1543<br>(0.02±<br>0.01) |
| 59 | Elemol                       | 639-99-6    | C <sub>15</sub> H <sub>26</sub> O | OS | 943 (950);<br>950 (958);<br>933 (940)               | 1549 | 93.1 (100), 161.2 (97.07), 59.1 (93.10);<br>93.1 (100), 161.2 (94.41), 59.1 (82.73);<br>93.1 (100), 161.2 (89.99), 59.1 (88.31)                                                     | NA                      | 1548<br>(0.42±<br>0.05)  | 1557<br>(16.67±<br>0.10) | 1548<br>(0.19±<br>0.01) |
| 60 | Germacrene B                 | 15423-57-1  | C <sub>15</sub> H <sub>24</sub>   | SH | 908 (908)                                           | 1554 | 121.1 (100), 93.1 (90.38), 105.1 (79.82)                                                                                                                                            | NA                      | NA                       | NA                       | 1554<br>(0.03±<br>0.01) |
| 61 | Nerolidol                    | 40716-66-3  | C <sub>15</sub> H <sub>26</sub> O | OS | 863 (863);<br>931 (938);<br>941 (950);<br>906 (911) | 1564 | 69.2 (100), 93.1 (84.83), 107.1 (51.52);<br>69.2 (100), 93.1 (97.66), 107.1 (66.85);<br>69.2 (100), 93.1 (93.98), 107.1 (64.33);<br>69.2 (100), 93.1 (96.15), 107.2 (66.52)         | 1564<br>(0.02±<br>0.01) | 1564<br>(0.80±<br>0.10)  | 1567<br>(1.53±<br>0.01)  | 1564<br>(0.09±<br>0.01) |
| 62 | Germacren D-4-ol             | 198991-79-6 | C <sub>15</sub> H <sub>26</sub> O | OS | 888 (893)                                           | 1574 | 81.1 (100), 161.1 (47.24), 105.1 (30.18)                                                                                                                                            | NA                      | 1574<br>(0.16±<br>0.01)  | NA                       | NA                      |
| 63 | 4,8,12-Trimethyl-            | 62235-06-7  | C <sub>16</sub> H <sub>26</sub>   | AH | 878 (893);<br>915 (927)                             | 1579 | 69.1 (100), 81.1 (57.51), 79.1 (27.69);<br>69.1 (100), 81.1 (50.60), 79.1 (18.43)                                                                                                   | NA                      | 1579<br>(0.12±           | NA                       | 1579<br>(0.14±          |



|    |                          |             |                                                |     |                      |      |                                                                                    |                  |                  |                  |                  |
|----|--------------------------|-------------|------------------------------------------------|-----|----------------------|------|------------------------------------------------------------------------------------|------------------|------------------|------------------|------------------|
|    | 1,3,7,11-tridecatetraene |             |                                                |     |                      |      |                                                                                    |                  | 0.01)            |                  | 0.01)            |
| 64 | Caryophyllene oxide      | 1139-30-6   | C <sub>15</sub> H <sub>24</sub> O              | SO  | 902 (904)            | 1580 | 93.1 (100), 79.1 (96.84), 91.1 (78.89)                                             | 1580 (0.11±0.03) | NA               | NA               | NA               |
| 65 | Cubenol                  | 21284-22-0  | C <sub>15</sub> H <sub>26</sub> O              | OS  | 846 (882)            | 1646 | 161.1 (100), 93.1 (79.30), 105.1 (69.02)                                           | NA               | NA               | 1592 (0.20±0.02) | NA               |
| 66 | Cadinol, α-              | 5937-11-1   | C <sub>15</sub> H <sub>26</sub> O              | OS  | 895(897)             | 1635 | 161.2 (100), 204.2 (38.85), 105.1 (28.24)                                          | NA               | 1640 (0.08±0.01) | NA               | NA               |
| 67 | Eudesmol, epi-γ-         | 117066-77-0 | C <sub>15</sub> H <sub>26</sub> O              | OS  | 933 (951)            | 1620 | 189.2 (100), 162.1 (72.76), 204.2 (61.03)                                          | NA               | NA               | 1520 (1.70±0.04) | NA               |
| 68 | Eudesmol, γ-             | 1209-71-8   | C <sub>15</sub> H <sub>26</sub> O              | OS  | 932 (933)            | 1635 | 189.2 (100), 161.2 (95.46), 204.2 (78.66)                                          | NA               | NA               | 1635 (5.69±0.20) | NA               |
| 69 | Agaruspirene             | 1460-73-7   | C <sub>15</sub> H <sub>26</sub> O              | OS  | 898 (950)            | 1646 | 161.2 (100), 119.2 (48.14), 107.1 (40.38)                                          | NA               | NA               | 1640 (0.31±0.04) | NA               |
| 70 | Eudesmol, β-             | 473-15-4    | C <sub>15</sub> H <sub>26</sub> O              | OS  | 952 (960)            | 1656 | 149.2 (100), 59.2 (78.76), 164.2 (44.78)                                           | NA               | NA               | 1656 (8.58±0.05) | NA               |
| 71 | Eudesmol, α-             | 473-16-5    | C <sub>15</sub> H <sub>26</sub> O              | OS  | 940 (951)            | 1659 | 149.2 (100), 161.2 (98.27), 204.2 (87.13)                                          | NA               | NA               | 1659 (3.62±0.04) | NA               |
| 72 | Bisabolol                | 515-69-5    | C <sub>15</sub> H <sub>26</sub> O              | OS  | 909 (999); 929 (930) | 1685 | 109.1 (100), 119.1 (85.04), 69.1 (70.55); 109.1 (100), 119.1 (82.45), 69.1 (78.55) | 1685 (0.07±0.01) | NA               | NA               | 1685 (0.11±0.01) |
| 73 | Elemyl acetate           | 60031-93-8  | C <sub>17</sub> H <sub>28</sub> O <sub>2</sub> | MAc | 889 (917)            | 1675 | 161.1 (100), 93.1 (93.07), 107.2 (76.68)                                           | NA               | NA               | 1678 (0.18±      | NA               |

|                            |                                     |            |                                                |     |                                                     |      |                                                                                                                                                                             |                  |                  |                  |                   |
|----------------------------|-------------------------------------|------------|------------------------------------------------|-----|-----------------------------------------------------|------|-----------------------------------------------------------------------------------------------------------------------------------------------------------------------------|------------------|------------------|------------------|-------------------|
|                            |                                     |            |                                                |     |                                                     |      |                                                                                                                                                                             |                  |                  | 0.01)            |                   |
| 74                         | Germacra-4(15),5,10(14)-trien-1β-ol | 81968-62-9 | C <sub>15</sub> H <sub>24</sub> O              | OS  | 941 (944)                                           | 1694 | 91.1 (100), 109.1 (88.64), 159.1 (87.25)                                                                                                                                    | NA               | NA               | 1686 (0.32±0.03) | NA                |
| 75                         | Farnesol                            | 106-28-5   | C <sub>15</sub> H <sub>26</sub> O              | OS  | 857 (857)                                           | 1722 | 69.2 (100), 81.1 (39.53), 93.0 (30.20)                                                                                                                                      | NA               | 1722 (0.03±0.01) | NA               | NA                |
| 76                         | Farnesal                            | 502-67-0   | C <sub>15</sub> H <sub>24</sub> O              | OS  | 886 (889)                                           | 1730 | 69.2 (100), 84.2 (51.27), 81.1 (27.62)                                                                                                                                      | NA               | NA               | 1743 (0.05±0.01) | NA                |
| 77                         | Neophytadiene                       | 504-96-1   | C <sub>20</sub> H <sub>38</sub>                | DH  | 879 (879)                                           | 1840 | 95.0 (100), 68.1 (79.29), 67.1 (68.76)                                                                                                                                      | NA               | NA               | NA               | 1840 (0.02±0.01)  |
| 78                         | Farnesol acetate                    | 264.208931 | C <sub>17</sub> H <sub>28</sub> O <sub>2</sub> | MAc | 881 (881)                                           | 1834 | 69.2 (100), 93.1 (56.81), 81.1 (35.71)                                                                                                                                      | NA               | NA               | 1843 (0.03±0.01) | NA                |
| 79                         | Citroptene                          | 487-06-9   | C <sub>11</sub> H <sub>10</sub> O <sub>4</sub> | AK  | 873 (873)                                           | 1916 | 206 (100), 178.2 (99.43), 163 (57.22)                                                                                                                                       | NA               | NA               | NA               | 1972 (0.02±0.001) |
| 80                         | Phytol                              | 150-86-7   | C <sub>20</sub> H <sub>40</sub> O              | OD  | 929 (931);<br>911 (913);<br>922 (923);<br>929 (931) | 2113 | 71.1 (100), 123.2 (43.38), 81.1 (33.37);<br>71.1 (100), 123.1 (44.94), 57.1 (38.08);<br>71.1 (100), 123.1 (44.15), 81.2 (38.00);<br>71.1 (100), 123.2 (47.34), 81.2 (39.51) | 2113 (1.62±0.12) | 2113 (0.21±0.02) | 2112 (0.39±0.01) | 2113 (0.78±0.04)  |
| Monoterpene hydrocarbons   |                                     |            |                                                |     |                                                     |      |                                                                                                                                                                             | 48.63            | 5.20             | 14.48            | 76.15             |
| Oxygenated monoterpenes    |                                     |            |                                                |     |                                                     |      |                                                                                                                                                                             | 42.74            | 89.52            | 3.91             | 13.52             |
| Sesquiterpene hydrocarbons |                                     |            |                                                |     |                                                     |      |                                                                                                                                                                             | 2.13             | 1.36             | 27.14            | 6.60              |
| Oxygenated sesquiterpenes  |                                     |            |                                                |     |                                                     |      |                                                                                                                                                                             | 0.21             | 1.66             | 38.87            | 0.42              |
| oxygenated diterpenes      |                                     |            |                                                |     |                                                     |      |                                                                                                                                                                             | 1.61             | 0.21             | 0.39             | 0.79              |
| Others                     |                                     |            |                                                |     |                                                     |      |                                                                                                                                                                             | 0.28             | 0.02             | 0.10             | 0.52              |
| Total                      |                                     |            |                                                |     |                                                     |      |                                                                                                                                                                             | 95.78            | 97.97            | 84.88            | 97.99             |

<sup>a</sup>Class of chemical compounds: *MH* monoterpene hydrocarbon, *MO* monoterpene oxide, *MA* monoterpene aldehyde, *OM* monoterpene alcohol, *MAc* monoterpene acetate, *SH* sesquiterpene hydrocarbon, *SA* sesquiterpene aldehyde, *OS* sesquiterpene alcohol, *DH* diterpene, *OD* oxygenated diterpene, *AH* acyclic hydrocarbon, *AK* acyclic ketone, *AE* acyclic ester, *OA* acyclic alcohol

<sup>b</sup>Matching scores of compounds reported  $\geq 80\%$  based on the mass spectra in NIST library database and in the order of *C. limon* EO (CL), *C. hystrix* EO (CH), *C. microcarpa* EO (CM), *C. pyriformis* EO (CP).

<sup>c</sup>Fragmentation patterns reported in order of *C. limon*, *C. hystrix*, *C. microcarpa*, and *C. pyriformis*.

<sup>d</sup>Retention index (RI) values calculated using Van den Dool and Kratz equation with reference to RI values from NIST WebBook, and Adams (2007) within the range of  $\pm 10$ .

<sup>e</sup>Relative percentage abundance calculated on the basis of TIC (Total Ion Chromatogram) area as the percentage of total TIC area.

NA: compound not available.

**Table S2.** Yields of four *Citrus* spp. leaf essential oils.

| <b><i>Citrus</i> spp.</b> | <b>Yields (% w/w)</b> |
|---------------------------|-----------------------|
| <i>C. hystrix</i>         | 0.72                  |
| <i>C. limon</i>           | 0.41                  |
| <i>C. pyriformis</i>      | 0.28                  |
| <i>C. microcarpa</i>      | 0.49                  |

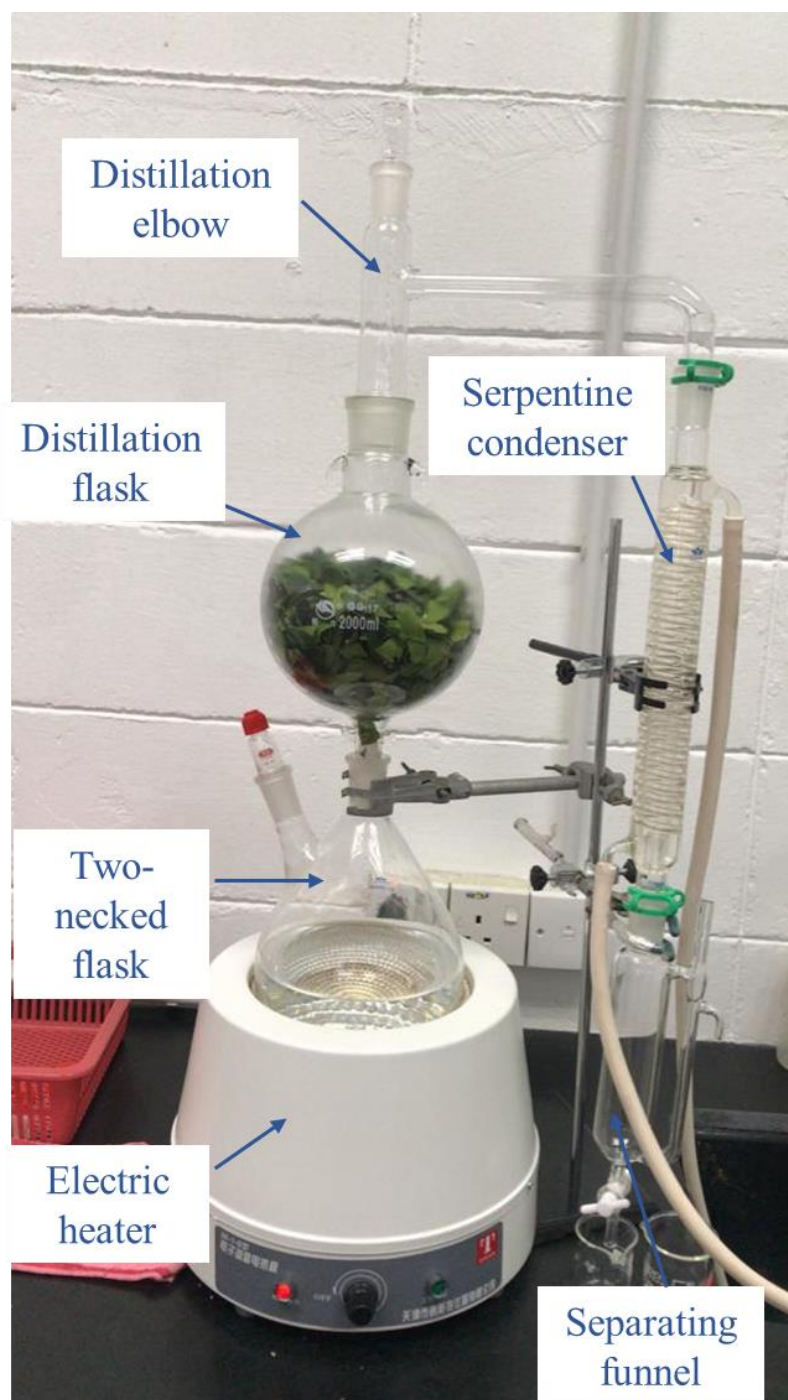

**Figure S1.** Steam distillation equipment used for the extraction of *Citrus* spp. leaf essential oils.
